# Supplementary material for: Genome-Wide Identification, Sequence Variation, and Expression of the Glycerol-3-Phosphate Acyltransferase (GPAT) Gene Family in Gossypium
Source: Front Genet. 2019 Feb 20;10:116. doi: 10.3389/fgene.2019.00116 (PMC6391866; doi:10.3389/fgene.2019.00116)
Supplement: Table S4 — The cis-elements in the promoter regions of GhGPATs. [file Table_4.xlsx]

## Sheet: Table S4
	Table S4. The cis-elements in the promoter regions of GhGPATs.
1	2	3	4	5	6	7	8	9	10	11	12	13	14	15	16	17	18	19	20	21	22	23	24	25	26	27	28
GhGPAT1	GhGPAT2	GhGPAT3	GhGPAT4	GhGPAT5	GhGPAT6	GhGPAT7	GhGPAT8	GhGPAT9	GhGPAT10	GhGPAT11	GhGPAT12	GhGPAT13	GhGPAT14	GhGPAT15	GhGPAT16	GhGPAT17	GhGPAT18	GhGPAT19	GhGPAT20	GhGPAT21	GhGPAT22	GhGPAT23	GhGPAT24	GhGPAT25	GhGPAT26	GhGPAT27	GhGPAT28
