# Supplementary material for: Genome-Wide Identification, Sequence Variation, and Expression of the Glycerol-3-Phosphate Acyltransferase (GPAT) Gene Family in Gossypium
Source: Front Genet. 2019 Feb 20;10:116. doi: 10.3389/fgene.2019.00116 (PMC6391866; doi:10.3389/fgene.2019.00116)
Supplement: Table S6 — Oil and protein QTLs. [file Table_6.xlsx]

## Sheet: Table S6
Table S6. Oil and protein QTLs.
File	QTL	Chromosome	Trait	LOD	R-sq	Left/cM	Right/cM	Marker
inter	qPro2-c3-1	A03/c3	Protein	2.44	5.77	0	16	BNL3408, BNL3441, MUSB1101, BNL3989, BNL3463, BNL3259, JESPR107
inter	qPro1-C3-1	A03/c3	Protein	3.17	32.11	16.9	50.5
inter	qOil3-C3-1	A03/c3	oil	2.53	8.94	16.9	50.5
inter	qpro2-c3-2	A03/c3	Protein	2.99	15.15	65.7	72.4
upland	QTLoil6.h	A04/c4	Oil	2.96	13.08	8.93	12.06	NAU2231, BNL4047, BNL3994, CIR048, BNL4049, BNL2572
upland	QTLprotein12.h	A04/c4	Protein	3.88	14.93	30.72	34.41
upland	QTLoil5.h	A04/c4	Oil	2.94	10.76	30.72	34.41
inter	qpro3-c5-1	A05/c5	Protein	2.23	5.61	91.1	100.3	CIR224, NAU2029, BNL2448, BNL2656, BNL1878, JESPR241, NAU2001, CIR301, BNL3995
inter	qpro3-c6-1	A06/c6	Protein	2.6	6.55	0	14.6	BNL3359, CIR017, BNL1440, BNL1064, BNL3650, BNL2884, BNL2569
upland	QTLprotein10.h	A06/c6	Protein	0.71	4.35	0	6.54
upland	QTLprotein11.h	A06/c6	Protein	2.93	6.15	24.22	37.16
upland	qCP06.1	A06/c6	Protein	4.1	11.9	50	64.9
upland	qCO06.1	A06/c6	Oil	3	6.7	51.6	66.6
upland	qCO08.1	A08/c8	Oil	2.7	5.2	84.3	100.7	BNL3627, BNL1017, CIR209, BNL3474, NAU1164, BNL2961, BNL3255, BNL3556, JESPR232
upland	qOC-9-1	A09/c9	Oil	0	6.99	0	0	BNL1707, CIR353, BNL3779, NAU1360, BNL2847, BNL3582, JESPR248, BNL1317, BNL1414, JESPR208, BNL1030, MUSS083, BNL2590, BNL4053
upland	qPC-9	A09/c9	Protein	0	6.79	0	0
upland	qOC-9-2	A09/c9	Oil	0	9.22	0	0
upland	qCP11.1	A11/c11	Protein	2.2	5.2	71.9	75.1	BNL3442, BNL3147, BNL1151, BNL1404, JESPR135, BNL1681, BNL4094, BNL2632, BNL0625, BNL2805, BNL3592, BNL1408, BNL3649, BNL1066
inter	qoil1-c11-1	A11/c11	oil	2.27	5.45	85.2	88.7
inter	qPro1-c20-1	D10/c20	Protein	2.13	5.99	15.6	25.7	CIR187, MUSS467, CIR094, BNL1145, NAU2017, BNL2570, BNL3948, BNL3379, JESPR244, BNL3993, BNL3071, JESPR235, JESPR190, BNL3280
inter	qOil2-c20-1	D10/c20	oil	2.15	5.78	23.5	25.7
inter	qPro1-c20-2	D10/c20	Protein	3.25	19.79	41.7	73.8
inter	qOil4-c21-1	D11/c21	oil	2.58	22.2	60.5	71.1	CIR156, CIR013, BNL3147, BNL3171, BNL1681, BNL1053, NAU4855, NAU5217, NAU2950, BNL2632, NAU2110, BNL3997, BNL2895, JESPR244, BNL3649, BNL1551, BNL3279, CIR077
inter	qPro1-c21-1	D11/c21	Protein	3.43	32.5	30.2	60.5
inter	qOil2-c21-1	D11/c21	oil	2.45	25.6	60.5	71.1
inter	qPro2-c21-1	D11/c21	Protein	2.08	16.96	60.5	71.1
inter	qOil3-c21-1	D11/c21	oil	2.79	7.09	74.9	81.1
upland	qCP21.1	D11/c21	Protein	9.8	16.2	157.2	166.8
upland	qCO21.1	D11/c21	Oil	12.7	20.3	164.7	166.8
upland	qPC-22-2	D04/c22	Protein	3	2.27	0	3	BNL4092, BNL4030, MUSB1093, CIR172, BNL3994, CIR048, BNL4049, NAU2291, BNL3873, NAU2235
upland	qPC-22-1	D04/c22	Protein	3	2.84	31.6	35.6
upland	qCO22.1	D04/c22	Oil	2.6	7.2	67.6	84.2
upland	qCP22.1	D04/c22	Protein	2.8	7.4	68.5	90.2
upland	qCP23.1	D09/c23	Protein	2.6	7.3	56.2	59.4	NAU1035, CIR286, BNL0686, BNL1161, BNL3383, MUSB0973, BNL2690, CIR019, MUSB1040, BNL3511, CIR283, BNL1317, JESPR110, JESPR208, BNL1030, BNL4053, BNL3173
upland	qCO23.1	D09/c23	Oil	2.1	6.1	56.2	68.9
inter	qPro1-c24-1	D08/c24	Protein	4.1	28.17	34.4	43.8	CIR343, BNL1646, BNL3627, BNL3084, CIR289, BNL2499, MUSS500, BNL2961, BNL1521, MUSS250, CIR354, BNL3860, NAU2407, JESPR157
inter	qPro1-c24-2	D08/c24	Protein	2.87	33.1	48.4	83.4
inter	qOil2-c24-1	D08/c24	oil	3.22	18.4	48.4	83.4
upland	qPC-25	D06/c25	Protein	3	12.41	1.4	6.2	CIR267, BNL3436, BNL1061, BNL3103, BNL3806, JESPR227, BNL1440, BNL1153, CIR407, CIR150, CIR299, BNL1417, CIR338, NAU1277
upland	qPC-25	D06/c25	Protein	3	8.94	2.5	6.2
upland	QTLoil1.h	D06/c25	Oil	2.55	10.87	0	6.6
upland	qOC-25	D06/c25	Oil	0	10.07	0	0
upland	qCO26.1	D12/c26	Oil	2.4	6.1	45.8	56	BNL3599, MUSS303, BNL3510, JESPR092, BNL1669, BNL1227, MUCS064, BNL0341, BNL3482, CIR085, BNL2495, CIR078, CIR032, BNL3537, JESPR300, NAU3896
upland	qCP26.1	D12/c26	Protein	3	20.2	59.5	65.4
